# Supplementary material for: MT1-MMP Inhibits the Activity of Bst-2 via Their Cytoplasmic Domains Dependent Interaction
Source: MDPI journal article supplement (doi:10.3390/ijms17060818), 2016-05-26
Supplement: s1 [file s1]

# Supplementary Materials: MT1-MMP Inhibits the Activity of Bst-2 via Their Cytoplasmic Domains Dependent Interaction

Long Fan, Li Liu, Cuicui Zhu, Qingyi Zhu, Shan Lu and Ping Liu

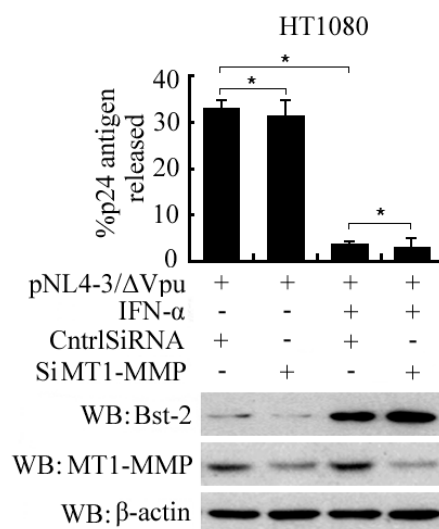

**Figure S1.** HT1080 cells were transfected as indicated in figure. Forty-eight hours later, culture supernatants and cells were harvested for virus release assay and western-blot assay. \*  $p < 0.01$ .
